# Supplementary material for: Interfractional Geometric Variations and Dosimetric Benefits of Stereotactic MRI Guided Online Adaptive Radiotherapy (SMART) of Prostate Bed after Radical Prostatectomy: Post-Hoc Analysis of a Phase II Trial
Source: MDPI journal article supplement (doi:10.3390/cancers13112802), 2021-06-04
Supplement: s1 [file s1]

Supplemental Table S1. Patient and treatment characteristics (n = 11)

|                                                                                                                  |                                             |
|------------------------------------------------------------------------------------------------------------------|---------------------------------------------|
| Age<br>Mean (SD)<br>Median (Range)                                                                               | 66.5 (7.9)<br>63.0 (63-73)                  |
| Risk Group, n (%)<br>Favorable intermediate risk<br>Unfavorable intermediate risk<br>High risk<br>Very high risk | 1 (9.1)<br>4 (36.4)<br>4 (36.4)<br>2 (18.2) |
| Gleason Grade Group<br>Mean (SD)<br>Median (Range)                                                               | 3 (1.2)<br>3 (2.5-4.5)                      |
| Pathologic T stage, n (%)<br>2<br>3                                                                              | 4 (36.4)<br>7 (63.6)                        |
| Pre-operative PSA<br>Mean (SD)<br>Median (Range)                                                                 | 16.6 (21.0)<br>10.1 (7.8-14.1)              |
| Post-operative PSA<br>Mean (SD)<br>Median (Range)                                                                | 0.3 (0.3)<br>0.3 (0.2-0.4)                  |
| Radiation Intent, n (%)<br>Salvage<br>Adjuvant                                                                   | 11 (100.0)<br>0 (0)                         |
| Dose to prostate bed<br>Mean (SD)<br>Median (Range)                                                              | 32.2 (1.3)<br>32.0 (32.0-33.0)              |
| ADT use, n (%)<br>Yes<br>No                                                                                      | 5 (45.5)<br>6 (54.5)                        |
